# Supplementary material for: Biodegradable polymer–platinum drug conjugates to overcome platinum drug resistance
Source: Royal Society of Chemistry journal article supplement (doi:10.1039/c5ra11297d), 2015-01-01
Supplement: c5ra11297d1.pdf [file c5ra11297d1.pdf]

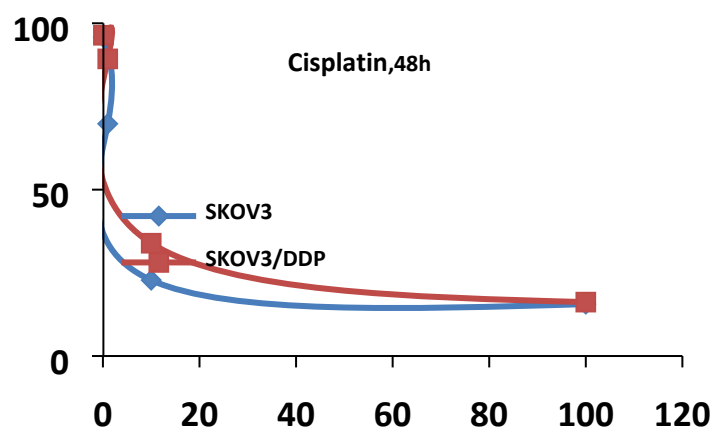

Fig. S1. Representative dose-dependent cell viability curve of cisplatin on cisplatin-sensitive Human ovarian cancer SKOV3 cells and cisplatin-resistant human ovarian cancer SKOV3/DDP cells (mean  $\pm$  SD, n=3).
